# Supplementary material for: Flash Continuous Home Glucose Monitoring to Improve Adherence to Self-Monitoring of Blood Glucose and Self-Efficacy in Adolescents With Type 1 Diabetes
Source: Oxford University Press journal article supplement (doi:10.2337/cd19-0051), 2020-02-29
Supplement: cd190051supplementarydata.pdf [file cd190051supplementarydata.pdf]

SUPPLEMENTARY DATA

**Supplementary Appendix 1. The Confidence in Diabetes Self-care (CIDS) survey**

In each item, circle the answer that best represents your knowledge in each aspect.

|    | I believe I can...                                                    | Yes, I am sure I can | Yes, I am quite sure I can | Yes, I think I can | No, I am quite sure I cannot | No, I am sure I cannot |
|----|-----------------------------------------------------------------------|----------------------|----------------------------|--------------------|------------------------------|------------------------|
| 1  | Plan my meals and snacks according to dietary guidelines.             | 5                    | 4                          | 3                  | 2                            | 1                      |
| 2  | Check my blood glucose at least two times a day.                      | 5                    | 4                          | 3                  | 2                            | 1                      |
| 3  | Perform the prescribed number of daily injections.                    | 5                    | 4                          | 3                  | 2                            | 1                      |
| 4  | Adjust my insulin dose for exercise, traveling, or celebrations.      | 5                    | 4                          | 3                  | 2                            | 1                      |
| 5  | Adjust my insulin when I am sick.                                     | 5                    | 4                          | 3                  | 2                            | 1                      |
| 6  | Detect high levels of blood glucose in time to correct.               | 5                    | 4                          | 3                  | 2                            | 1                      |
| 7  | Detect low levels of blood glucose in time to correct.                | 5                    | 4                          | 3                  | 2                            | 1                      |
| 8  | Treat a high blood glucose correctly                                  | 5                    | 4                          | 3                  | 2                            | 1                      |
| 9  | Treat a low blood glucose correctly                                   | 5                    | 4                          | 3                  | 2                            | 1                      |
| 10 | Keep daily records of my blood glucose                                | 5                    | 4                          | 3                  | 2                            | 1                      |
| 11 | Decide when it's necessary to contact my doctor or diabetes educator. | 5                    | 4                          | 3                  | 2                            | 1                      |
| 12 | Ask my doctor questions about my treatment plan.                      | 5                    | 4                          | 3                  | 2                            | 1                      |

SUPPLEMENTARY DATA

|    |                                                                         |   |   |   |   |   |
|----|-------------------------------------------------------------------------|---|---|---|---|---|
| 13 | Keep my blood glucose in the normal range when under stress             | 5 | 4 | 3 | 2 | 1 |
| 14 | Check my feet for sores or blisters every day.                          | 5 | 4 | 3 | 2 | 1 |
| 15 | Ask my friends or relatives for help with my diabetes.                  | 5 | 4 | 3 | 2 | 1 |
| 16 | Inform colleagues/others of my diabetes, if needed                      | 5 | 4 | 3 | 2 | 1 |
| 17 | Keep my medical appointments                                            | 5 | 4 | 3 | 2 | 1 |
| 18 | Exercise two to three times weekly.                                     | 5 | 4 | 3 | 2 | 1 |
| 19 | Figure out what foods to eat when dining out.                           | 5 | 4 | 3 | 2 | 1 |
| 20 | Read and hear about diabetes complications without getting discouraged. | 5 | 4 | 3 | 2 | 1 |

“©2003 by the American Diabetes Association ® Diabetes Care 2003 Mar; 26(3): 713-718 Reprinted with permission from the American Diabetes Association ®”

## SUPPLEMENTARY DATA

### **Supplementary Appendix 2. Teaching plan created by Paediatric Diabetes service**

#### **Week 1 and 2**

- Day 1: Do finger prick BG tests as before, i.e. before the 3 main meals and at bedtime.
- After day 1 to week 2:
- ✓ Scan before and 2 hours after a meal
- ✓ Enter carbs, insulin doses and/or exercise
- ✓ Adjust carb ratio, sensitivity/correction factor and basal rates/dose accordingly
- ✓ Record food diary and illness or stress

#### **Week 2 (day 14)**

- ✓ Download data at <https://www2.libreview.com/> or <https://www1.libreview.com/>
- ✓ Email report to Diabetes Nurse at [childdm@kkh.com.sg](mailto:childdm@kkh.com.sg)
- ✓ Start telehealth either by video-consultation or phone consultation

#### **Week 3 and 4 – Adjust insulin doses, food types and amounts based on the glucose trends and patterns**

- ✓ Scan before and 2 hours after a meal
- ✓ Enter carbs, insulin doses and/or exercise
- ✓ Adjust carb ratio, sensitivity/correction factor and basal rates/dose accordingly
- ✓ Record food diary and illness or stress

#### **Week 4 (day 28)**

- ✓ Download data at **Error! Hyperlink reference not valid.**<https://www2.libreview.com/> or <https://www1.libreview.com/>
  - ✓ Email report to Diabetes Nurse at [childdm@kkh.com.sg](mailto:childdm@kkh.com.sg)
- Start telehealth either by video-consultation or phone consultation

SUPPLEMENTARY DATA

**Supplementary Appendix 3. Suggestions for patient selection and use of FGM (FreeStyle Libre)**

|                                                                                                                                                                                                                                                  |                                                                                                                                                                                                                                                                                                                                                                                                                                                                                                                                                                                                                                                                              |
|--------------------------------------------------------------------------------------------------------------------------------------------------------------------------------------------------------------------------------------------------|------------------------------------------------------------------------------------------------------------------------------------------------------------------------------------------------------------------------------------------------------------------------------------------------------------------------------------------------------------------------------------------------------------------------------------------------------------------------------------------------------------------------------------------------------------------------------------------------------------------------------------------------------------------------------|
| <ul style="list-style-type: none"> <li>• Requires no daily calibration; however, fingerstick testing may still be needed in certain situations (see Limitations)</li> </ul>                                                                      | <ul style="list-style-type: none"> <li>• Not indicated for children &lt;18 years (US)</li> </ul>                                                                                                                                                                                                                                                                                                                                                                                                                                                                                                                                                                             |
| <ul style="list-style-type: none"> <li>• Ease of use by the patient</li> <li>• Up to 14-day sensor wear (ex-U.S.) and up to 10 days in the U.S. version*</li> </ul>                                                                              | <ul style="list-style-type: none"> <li>• No data available for the first 12 h during warm-up period*</li> <li>• Does not have real-time sharing capabilities</li> </ul>                                                                                                                                                                                                                                                                                                                                                                                                                                                                                                      |
| <ul style="list-style-type: none"> <li>• Can be used to dose insulin without confirmatory testing under most circumstances</li> </ul>                                                                                                            | <ul style="list-style-type: none"> <li>• Not recommended for those with hypoglycemia unawareness</li> </ul>                                                                                                                                                                                                                                                                                                                                                                                                                                                                                                                                                                  |
| <ul style="list-style-type: none"> <li>• Results can be shared with clinician via LibreLink app (via Android phone only)</li> <li>• Can be used in children/adolescents 4–17 years (ex-U.S.)</li> <li>• Measures glucose 40–500 mg/dL</li> </ul> | <ul style="list-style-type: none"> <li>• Does not provide alarms for current/impending glucose events</li> <li>• Is a “passive” system—data not transmitted continuously from sensor; results are available only when the sensor is scanned with a reading device (however, this may not be a limitation in less intensively managed patients not on insulin)</li> <li>• Full 24-h data can be captured and downloaded only if the sensor is scanned at least every 8 h</li> </ul>                                                                                                                                                                                           |
| <ul style="list-style-type: none"> <li>• Can be used in pregnancy (ex-U.S.)</li> </ul>                                                                                                                                                           | <ul style="list-style-type: none"> <li>• Does not allow for “recalibration” or detection of poor individual sensor function</li> </ul>                                                                                                                                                                                                                                                                                                                                                                                                                                                                                                                                       |
| <ul style="list-style-type: none"> <li>• No interference by acetaminophen</li> </ul>                                                                                                                                                             | <ul style="list-style-type: none"> <li>• In the U.S., currently is indicated for adults only</li> </ul>                                                                                                                                                                                                                                                                                                                                                                                                                                                                                                                                                                      |
| <ul style="list-style-type: none"> <li>• Lower cost than rtCGM systems</li> <li>• Medicare approved</li> <li>• Measures blood ketones with special test strips</li> </ul>                                                                        | <ul style="list-style-type: none"> <li>• Requires fingerstick confirmatory testing under the following conditions:             <ul style="list-style-type: none"> <li>- Hypoglycemia (<math>\leq 70</math> mg/dL)</li> <li>- Impending hypoglycemia</li> <li>- Rapidly changing glucose</li> <li>- Symptoms of low or high blood glucose</li> <li>- 12-h warm-up period</li> <li>- When symptoms do not match system readings or when inaccurate readings are suspected</li> </ul> </li> <li>• Accuracy in hypoglycemic and hyperglycemic ranges is suboptimal</li> <li>• Does not currently connect to insulin pumps or other platforms (e.g., smart pens, apps)</li> </ul> |

Adopted from Edelman, S.V., Argento, N.B., Pettus, J., and Hirsch, I.B. (2018). Clinical Implications of Real-time and Intermittently Scanned Continuous Glucose Monitoring. *Diabetes Care*, 41(11), 2265-2274. Retrieved from <https://doi.org/10.2337/dc18-1150>
